# Supplementary material for: Ecosystem services in European protected areas: Ambiguity in the views of scientists and managers?
Source: PubMed Central journal article supplement (PMC5687704; doi:10.1371/journal.pone.0187143), 2017-11-15
Supplement: pone.0187143.s003.pdf [file pone.0187143.s003.pdf]

### S3. Example of the survey sent to PA managers

Filled in by PA managers of the Curonian lagoon and Nenumas Delta

| How important are the following ecosystem services to the beneficiaries of the PA?<br>(relative to the other ecosystem services, on a scale from 1 (least important) to 5 (most important) 0 = not important or unknown) |                                                             |                          |                          |                          |                          |                          |                          |
|--------------------------------------------------------------------------------------------------------------------------------------------------------------------------------------------------------------------------|-------------------------------------------------------------|--------------------------|--------------------------|--------------------------|--------------------------|--------------------------|--------------------------|
| <b>Ecosystem service</b>                                                                                                                                                                                                 |                                                             | <b>0</b>                 | <b>1</b>                 | <b>2</b>                 | <b>3</b>                 | <b>4</b>                 | <b>5</b>                 |
| <b>Provisioning services</b>                                                                                                                                                                                             | Agriculture, meat                                           | X                        | <input type="checkbox"/> | <input type="checkbox"/> | <input type="checkbox"/> | <input type="checkbox"/> | <input type="checkbox"/> |
|                                                                                                                                                                                                                          | Agriculture , grain                                         | X                        | <input type="checkbox"/> | <input type="checkbox"/> | <input type="checkbox"/> | <input type="checkbox"/> | <input type="checkbox"/> |
|                                                                                                                                                                                                                          | Fisheries                                                   | <input type="checkbox"/> | <input type="checkbox"/> | <input type="checkbox"/> | <input type="checkbox"/> | <input type="checkbox"/> | X                        |
|                                                                                                                                                                                                                          | Farmed sea food                                             | X                        | <input type="checkbox"/> | <input type="checkbox"/> | <input type="checkbox"/> | <input type="checkbox"/> | <input type="checkbox"/> |
|                                                                                                                                                                                                                          | Genetic resources                                           | X                        | <input type="checkbox"/> | <input type="checkbox"/> | <input type="checkbox"/> | <input type="checkbox"/> | <input type="checkbox"/> |
|                                                                                                                                                                                                                          | Timber                                                      | <input type="checkbox"/> | <input type="checkbox"/> | <input type="checkbox"/> | <input type="checkbox"/> | X                        | <input type="checkbox"/> |
|                                                                                                                                                                                                                          | Wild land meat                                              | X                        | <input type="checkbox"/> | <input type="checkbox"/> | <input type="checkbox"/> | <input type="checkbox"/> | <input type="checkbox"/> |
|                                                                                                                                                                                                                          | Wild non meat food products (e.g. berries, mushrooms, kelp) | <input type="checkbox"/> | X                        | <input type="checkbox"/> | <input type="checkbox"/> | <input type="checkbox"/> | <input type="checkbox"/> |
|                                                                                                                                                                                                                          | Fresh water                                                 | X                        | <input type="checkbox"/> | <input type="checkbox"/> | <input type="checkbox"/> | <input type="checkbox"/> | <input type="checkbox"/> |
|                                                                                                                                                                                                                          | Energy production (e.g. hydropower, wind farms)             | X                        | <input type="checkbox"/> | <input type="checkbox"/> | <input type="checkbox"/> | <input type="checkbox"/> | <input type="checkbox"/> |
|                                                                                                                                                                                                                          | <i>Please fill in if others:</i>                            |                          |                          |                          |                          |                          |                          |
|                                                                                                                                                                                                                          | Amber extraction                                            | <input type="checkbox"/> | <input type="checkbox"/> | <input type="checkbox"/> | <input type="checkbox"/> | <input type="checkbox"/> | X                        |
|                                                                                                                                                                                                                          | Geothermic water                                            | <input type="checkbox"/> | <input type="checkbox"/> | <input type="checkbox"/> | <input type="checkbox"/> | <input type="checkbox"/> | X                        |
|                                                                                                                                                                                                                          | <input type="checkbox"/>                                    | <input type="checkbox"/> | <input type="checkbox"/> | <input type="checkbox"/> | <input type="checkbox"/> | <input type="checkbox"/> |                          |
| <b>Regulating services</b>                                                                                                                                                                                               | Carbon sequestration and storage                            | <input type="checkbox"/> | <input type="checkbox"/> | <input type="checkbox"/> | X                        | <input type="checkbox"/> | <input type="checkbox"/> |
|                                                                                                                                                                                                                          | Erosion prevention (coastal or inland)                      | <input type="checkbox"/> | X                        | <input type="checkbox"/> | <input type="checkbox"/> | <input type="checkbox"/> | <input type="checkbox"/> |
|                                                                                                                                                                                                                          | Lifecycle and habitat protection                            | <input type="checkbox"/> | <input type="checkbox"/> | <input type="checkbox"/> | <input type="checkbox"/> | X                        | <input type="checkbox"/> |
|                                                                                                                                                                                                                          | Pollination                                                 | <input type="checkbox"/> | <input type="checkbox"/> | <input type="checkbox"/> | <input type="checkbox"/> | <input type="checkbox"/> | X                        |
|                                                                                                                                                                                                                          | Pest and disease control                                    | <input type="checkbox"/> | <input type="checkbox"/> | <input type="checkbox"/> | <input type="checkbox"/> | <input type="checkbox"/> | X                        |
|                                                                                                                                                                                                                          | Water treatment                                             | X                        | <input type="checkbox"/> | <input type="checkbox"/> | <input type="checkbox"/> | <input type="checkbox"/> | <input type="checkbox"/> |
|                                                                                                                                                                                                                          | Flood prevention                                            | X                        | <input type="checkbox"/> | <input type="checkbox"/> | <input type="checkbox"/> | <input type="checkbox"/> | <input type="checkbox"/> |
|                                                                                                                                                                                                                          | <i>Please fill in if others:</i>                            |                          |                          |                          |                          |                          |                          |
|                                                                                                                                                                                                                          | <input type="checkbox"/>                                    | <input type="checkbox"/> | <input type="checkbox"/> | <input type="checkbox"/> | <input type="checkbox"/> | <input type="checkbox"/> |                          |
| <b>Cultural services</b>                                                                                                                                                                                                 | Spiritual significance                                      | <input type="checkbox"/> | <input type="checkbox"/> | <input type="checkbox"/> | <input type="checkbox"/> | X                        | <input type="checkbox"/> |
|                                                                                                                                                                                                                          | Recreation                                                  | <input type="checkbox"/> | X                        | <input type="checkbox"/> | <input type="checkbox"/> | <input type="checkbox"/> | <input type="checkbox"/> |
|                                                                                                                                                                                                                          | Education                                                   | <input type="checkbox"/> | <input type="checkbox"/> | X                        | <input type="checkbox"/> | <input type="checkbox"/> | <input type="checkbox"/> |
|                                                                                                                                                                                                                          | Aesthetic qualities                                         | <input type="checkbox"/> | X                        | <input type="checkbox"/> | <input type="checkbox"/> | <input type="checkbox"/> | <input type="checkbox"/> |
|                                                                                                                                                                                                                          | Research                                                    | <input type="checkbox"/> | <input type="checkbox"/> | X                        | <input type="checkbox"/> | <input type="checkbox"/> | <input type="checkbox"/> |
|                                                                                                                                                                                                                          | <i>Please fill in if others:</i>                            |                          |                          |                          |                          |                          |                          |
|                                                                                                                                                                                                                          | <input type="checkbox"/>                                    | <input type="checkbox"/> | <input type="checkbox"/> | <input type="checkbox"/> | <input type="checkbox"/> | <input type="checkbox"/> |                          |
| <b>Other</b>                                                                                                                                                                                                             | <i>Please fill in if others:</i>                            |                          |                          |                          |                          |                          |                          |
|                                                                                                                                                                                                                          |                                                             | <input type="checkbox"/> | <input type="checkbox"/> | <input type="checkbox"/> | <input type="checkbox"/> | <input type="checkbox"/> | <input type="checkbox"/> |
|                                                                                                                                                                                                                          | <input type="checkbox"/>                                    | <input type="checkbox"/> | <input type="checkbox"/> | <input type="checkbox"/> | <input type="checkbox"/> | <input type="checkbox"/> |                          |

| What are the most damaging environmental pressures or threats to your PA? |                          |                          |                          |                          |
|---------------------------------------------------------------------------|--------------------------|--------------------------|--------------------------|--------------------------|
| Environmental pressures                                                   | High pressure            | Medium pressure          | Low pressure             | No pressure              |
| Agriculture                                                               | <input type="checkbox"/> | <input type="checkbox"/> | X                        | <input type="checkbox"/> |
| Forestry                                                                  | <input type="checkbox"/> | X                        | <input type="checkbox"/> | <input type="checkbox"/> |
| Climate change                                                            | <input type="checkbox"/> | <input type="checkbox"/> | X                        | <input type="checkbox"/> |
| Invasive species                                                          | <input type="checkbox"/> | X                        | <input type="checkbox"/> | <input type="checkbox"/> |
| Eutrophication                                                            | X                        | <input type="checkbox"/> | <input type="checkbox"/> | <input type="checkbox"/> |
| Tourism                                                                   | X                        | <input type="checkbox"/> | <input type="checkbox"/> | <input type="checkbox"/> |
| Pollution                                                                 | <input type="checkbox"/> | <input type="checkbox"/> | X                        | <input type="checkbox"/> |
| Hunting                                                                   | <input type="checkbox"/> | <input type="checkbox"/> | <input type="checkbox"/> | X                        |

|                                                             |                          |                          |                          |                          |
|-------------------------------------------------------------|--------------------------|--------------------------|--------------------------|--------------------------|
| Fishing                                                     | <input type="checkbox"/> | <b>X</b>                 | <input type="checkbox"/> | <input type="checkbox"/> |
| Other biological resource extraction (e.g. shells, berries) | <input type="checkbox"/> | <input type="checkbox"/> | <b>X</b>                 | <input type="checkbox"/> |
| Transport                                                   | <b>X</b>                 | <input type="checkbox"/> | <input type="checkbox"/> | <input type="checkbox"/> |
| Landscape fragmentation                                     | <input type="checkbox"/> | <b>X</b>                 | <input type="checkbox"/> | <input type="checkbox"/> |
| <i>Please fill in if others:</i>                            |                          |                          |                          |                          |
| Sonar and sound pollution                                   | <input type="checkbox"/> | <input type="checkbox"/> | <input type="checkbox"/> | <b>X</b>                 |
|                                                             | <input type="checkbox"/> | <input type="checkbox"/> | <input type="checkbox"/> | <input type="checkbox"/> |
