# Supplementary material for: Ecosystem services in European protected areas: Ambiguity in the views of scientists and managers?
Source: PLOS journal article supplement (doi:10.1371/journal.pone.0187143), 2017-11-15
Supplement: S1 (10.1371/journal.pone.0187143.s001) [file journal.pone.0187143.s001]

S1. Example of the survey sent to, and answers from, the scientists working on protected areas.

Responsible scientific researcher filling in the table: Sander Wijnhoven

|                                                                    |                                      | Name of Protected Area (type of protection):<br>Western Scheldt & Saeftinghe (Natura2000) |                                                                                                                                                                                              |
|--------------------------------------------------------------------|--------------------------------------|-------------------------------------------------------------------------------------------|----------------------------------------------------------------------------------------------------------------------------------------------------------------------------------------------|
| Habitat / Ecosystem type                                           | Ecosystem service                    | Ecosystem functions and structures                                                        | Major threat(s)                                                                                                                                                                              |
| Tidal flats                                                        | Feeding grounds for birds and fish   | Primary and secondary production                                                          | Increasing hydrodynamics, Increasing elevation and steepening edges (deepening for shipping); Increasing wave-action (more and larger boats); Reduction of intertidal area; Invading species |
|                                                                    | Resting places for birds and mammals | Undisturbed habitats                                                                      | Disturbance by recreants and food-collectors                                                                                                                                                 |
|                                                                    | Cultural: Aesthetic values           | Habitat heterogeneity                                                                     | Reduction of intertidal area                                                                                                                                                                 |
|                                                                    | Cutting Sea-aster                    | Secondary production                                                                      | Over-exploitation                                                                                                                                                                            |
| Salt marshes                                                       | Protection of coastline              | Habitat heterogeneity                                                                     | Storm surges; Increasing hydrodynamics (deepening for shipping)                                                                                                                              |
|                                                                    | Charismatic species                  | Breeding grounds for birds (biodiversity)                                                 | Disturbance by recreants); Reduction of area salt marshes (deepening for shipping); aging of marshes (obstruction of succession)                                                             |
|                                                                    | Mediation of wastes                  | Nutrient cycling                                                                          | Reduction of area, change in species composition (spatial planning)                                                                                                                          |
|                                                                    | Tourism and wilderness experience    | Habitat heterogeneity and biodiversity                                                    | Disappearance appreciated plant species (by eutrophication)                                                                                                                                  |
| High dynamic gulleys                                               | Fishing                              | Secondary production                                                                      | Overfishing; Disturbance foodweb by pollutants; Disturbance foodweb by increasing sediment loads upstream (deepening for shipping)                                                           |
|                                                                    | Waterway for supertankers            | Surface, currents, hydrodynamics                                                          | Cons and impacts becoming larger than the benefits                                                                                                                                           |
|                                                                    | Cooling water intake                 | Buffering capacity, hydrodynamics                                                         | Invading species (fouling)                                                                                                                                                                   |
| Low dynamic shallow waters (e.g. subtidal flats and small gulleys) | Nursery area for shrimps and fish    | Habitat heterogeneity                                                                     | Overfishing; Increasing hydrodynamics (deepening for shipping); Reduction of low dynamic shallow water areas                                                                                 |
|                                                                    | Shellfish fisheries                  | Secondary production                                                                      | Overfishing; Increasing hydrodynamics (deepening for shipping); Increasing water turbidity; Reduction of low dynamic shallow water areas; Invading species                                   |
