# Supplementary material for: Ecosystem services in European protected areas: Ambiguity in the views of scientists and managers?
Source: PLOS journal article supplement (doi:10.1371/journal.pone.0187143), 2017-11-15
Supplement: S2 (10.1371/journal.pone.0187143.s002) [file journal.pone.0187143.s002]

**S2: Harmonisation tables for all variables.** (S2a) ecosystem services and (S2b) threats, and the classification of the variables into variables of biotic, abiotic or socio-economic (anthropogenic) nature, grey cells are variables indicated by PA managers

**S2a:**

| Harmonised variable       | Former (original) indication        | Classification |
|---------------------------|-------------------------------------|----------------|
| Aesthetic qualities       | Aesthetic qualities                 | Socio-economic |
| Aesthetic qualities       | Cultural heritage                   | Socio-economic |
| Animals of economic use   | Animal Production                   | Biotic         |
| Animals of economic use   | Aquaculture                         | Biotic         |
| Animals of economic use   | Bait collection                     | Biotic         |
| Animals of economic use   | Beekeeping                          | Biotic         |
| Animals of economic use   | Capture fisheries                   | Biotic         |
| Animals of economic use   | Cattle grazing                      | Biotic         |
| Animals of economic use   | Collecting of bait                  | Biotic         |
| Animals of economic use   | Commercial fisheries                | Biotic         |
| Animals of economic use   | Fishing                             | Biotic         |
| Animals of economic use   | Food provision                      | Biotic         |
| Animals of economic use   | Honey production                    | Biotic         |
| Animals of economic use   | Manual cockle fisheries             | Biotic         |
| Animals of economic use   | Oyster culture                      | Biotic         |
| Animals of economic use   | Shellfish fisheries                 | Biotic         |
| Animals of economic use   | Wild foods                          | Biotic         |
| Animals of economic use   | Agriculture, meat                   | Biotic         |
| Animals of economic use   | Farmed sea food                     | Biotic         |
| Animals of economic use   | Fisheries                           | Biotic         |
| Animals of economic use   | Wild land meat                      | Biotic         |
| Biodiversity conservation | Biodiversity Conservation           | Biotic         |
| Biodiversity conservation | Biodiversity protection             | Biotic         |
| Biodiversity conservation | Refuge for biodiversity             | Biotic         |
| Biodiversity conservation | Genetic resources                   | Biotic         |
| Charismatic landscape     | Aesthetic values                    | Abiotic        |
| Charismatic landscape     | Charismatic habitat                 | Abiotic        |
| Charismatic landscape     | Charismatic habitat and species     | Abiotic        |
| Charismatic landscape     | Charismatic landscapes              | Abiotic        |
| Charismatic landscape     | Cultural heritage                   | Abiotic        |
| Charismatic landscape     | Cultural landscape                  | Abiotic        |
| Charismatic landscape     | Iconic landscapes                   | Abiotic        |
| Charismatic species       | Charismatic reindeer                | Biotic         |
| Charismatic species       | Charismatic species                 | Biotic         |
| Charismatic species       | Existence value (of cetaceans)      | Biotic         |
| Charismatic species       | <b>Presence of flagship species</b> | Biotic         |
| Climate regulation        | Carbon sequestration                | Abiotic        |
| Climate regulation        | Carbon Uptake                       | Abiotic        |
| Climate regulation        | Climate regulation                  | Abiotic        |
| Climate regulation        | Local Scale Climate Regulation      | Abiotic        |
| Climate regulation        | Carbon sequestration and storage    | Abiotic        |

|                                  |                                                 |                |
|----------------------------------|-------------------------------------------------|----------------|
| Education and research           | Education                                       | Socio-economic |
| Education and research           | Research                                        | Socio-economic |
| Education and research           | Scientific research                             | Socio-economic |
| Education and research           | Education                                       | Socio-economic |
| Education and research           | Research                                        | Socio-economic |
| Energy production                | Energy production (e.g. hydropower, wind farms) | Socio-economic |
| Energy production                | Geothermal water                                | Socio-economic |
| Fire Protection                  | Wildfire regulation                             | Biotic         |
| Flood and coastal protection     | <b>Buffer for coastal erosion</b>               | Abiotic        |
| Flood and coastal protection     | Buffering floods                                | Abiotic        |
| Flood and coastal protection     | Coastal protection                              | Abiotic        |
| Flood and coastal protection     | Flood and erosion protection                    | Abiotic        |
| Flood and coastal protection     | Flood mitigation                                | Abiotic        |
| Flood and coastal protection     | <b>Flood retention</b>                          | Abiotic        |
| Flood and coastal protection     | Protection of coastline                         | Abiotic        |
| Flood and coastal protection     | Flood prevention                                | Abiotic        |
| Food provision for animals       | Fodder                                          | Biotic         |
| Food provision for animals       | Food for birds                                  | Biotic         |
| Food provision for animals       | Food for cattle                                 | Biotic         |
| Food provision for animals       | Food for fish                                   | Biotic         |
| Food provision for animals       | Grazing                                         | Biotic         |
| Food provision for animals       | Sheep fodder                                    | Biotic         |
| Food provision for animals       | Reed as raw material or fodder                  | Biotic         |
| Food provision for humans        | Food collection                                 | Biotic         |
| Habitat for feeding and breeding | Breeding places and shelter for birds           | Abiotic        |
| Habitat for feeding and breeding | Feeding and staging grounds for birds           | Abiotic        |
| Habitat for feeding and breeding | Feeding grounds for birds                       | Abiotic        |
| Habitat for feeding and breeding | Feeding grounds for fish                        | Abiotic        |
| Habitat for feeding and breeding | Fishing ground                                  | Abiotic        |
| Habitat for feeding and breeding | Migration corridor for fish                     | Abiotic        |
| Habitat for feeding and breeding | Nursery area                                    | Abiotic        |
| Habitat for feeding and breeding | Nursery area for shrimp and fish                | Abiotic        |
| Habitat for feeding and breeding | Nutrition for cattle                            | Abiotic        |
| Habitat for feeding and breeding | Rangeland for cattle                            | Abiotic        |
| Habitat for feeding and breeding | Resting place for birds                         | Abiotic        |
| Habitat for feeding and breeding | Resting place for mammals                       | Abiotic        |
| Habitat for feeding and breeding | Resting places for birds                        | Abiotic        |
| Habitat for feeding and breeding | Resting places for mammals                      | Abiotic        |
| Habitat for feeding and breeding | Sanctuary for fish fry                          | Abiotic        |
| Habitat for feeding and breeding | Spawning and nursery grounds for fish           | Abiotic        |
| Habitat for feeding and breeding | Water for aquaculture                           | Abiotic        |
| Habitat for feeding and breeding | Lifecycle and habitat protection                | Biotic         |
| Habitat for feeding and breeding | Nursery area - supporting                       | Biotic         |
| Hunting                          | Hunting                                         | Socio-economic |
| Hunting                          | Selling licenses                                | Socio-economic |
| Hydrological regulation          | Hydrological cycle and water flow maintenance   | Abiotic        |

|                             |                                        |                |
|-----------------------------|----------------------------------------|----------------|
| Hydrological regulation     | Hydrology                              | Abiotic        |
| Leisure activities          | Birdwatching                           | Socio-economic |
| Leisure activities          | Ecotourism                             | Socio-economic |
| Leisure activities          | Recreation                             | Socio-economic |
| Leisure activities          | Recreation and tourism                 | Socio-economic |
| Leisure activities          | Recreational activities                | Socio-economic |
| Leisure activities          | Recreational diving                    | Socio-economic |
| Leisure activities          | Recreational fishing and boating       | Socio-economic |
| Leisure activities          | Symbolic and Aesthetic values          | Socio-economic |
| Leisure activities          | Tourism                                | Socio-economic |
| Leisure activities          | Recreation and tourism                 | Socio-economic |
| Materials of economic use   | Amber extraction                       | Abiotic        |
| Materials of economic use   | Cooling water                          | Abiotic        |
| Materials of economic use   | Mining                                 | Abiotic        |
| Materials of economic use   | Salt production                        | Abiotic        |
| Materials of economic use   | Amber extraction                       | Abiotic        |
| Materials of economic use   | Gitios extraction                      | Abiotic        |
| Materials of economic use   | Salt production                        | Abiotic        |
| Plants of economic use      | Agriculture                            | Biotic         |
| Plants of economic use      | Biomass (wood, food)                   | Biotic         |
| Plants of economic use      | Biomass extraction                     | Biotic         |
| Plants of economic use      | Building material                      | Biotic         |
| Plants of economic use      | Cork Production                        | Biotic         |
| Plants of economic use      | Fruit crops                            | Biotic         |
| Plants of economic use      | Fuel pellets                           | Biotic         |
| Plants of economic use      | Pine seed extraction                   | Biotic         |
| Plants of economic use      | Plant collection                       | Biotic         |
| Plants of economic use      | Thatching materials                    | Biotic         |
| Plants of economic use      | Timber                                 | Biotic         |
| Plants of economic use      | Wild plants and their outputs          | Biotic         |
| Plants of economic use      | Agriculture , grain                    | Biotic         |
| Plants of economic use      | Timber                                 | Biotic         |
| Plants of economic use      | Wild non meat food products            | Biotic         |
| Pollination                 | Pollination                            | Biotic         |
| Pollination                 | Pollination and seed dispersal         | Biotic         |
| Pollination                 | Pollination                            | Biotic         |
| Prevention of erosion       | Control of erosion                     | Abiotic        |
| Prevention of erosion       | Erosion regulation                     | Abiotic        |
| Raw materials               | Sand, gravel, shell extraction         | Abiotic        |
| Resilience                  | Resilience                             | Biotic         |
| Sedimentological regulation | Land incrementation                    | Abiotic        |
| Sedimentological regulation | Mainenance of soil                     | Abiotic        |
| Sedimentological regulation | Maintenance of soil fertility          | Abiotic        |
| Sedimentological regulation | Soil formation                         | Abiotic        |
| Sedimentological regulation | Soil protection                        | Abiotic        |
| Sedimentological regulation | Erosion prevention (coastal or inland) | Abiotic        |

|                              |                                           |                |
|------------------------------|-------------------------------------------|----------------|
| Spiritual significance       | Spiritual significance                    | Socio-economic |
| Transport facilitation       | Shipping lanes                            | Socio-economic |
| Transport facilitation       | Waterway for shipping                     | Socio-economic |
| Waste and Toxicant mediation | Denitrification                           | Abiotic        |
| Waste and Toxicant mediation | Dewatering of wastewater treatment sludge | Abiotic        |
| Waste and Toxicant mediation | Mediation of wastes                       | Abiotic        |
| Waste and Toxicant mediation | Nutrient Regulation                       | Abiotic        |
| Waste and Toxicant mediation | Pollution trapping                        | Abiotic        |
| Waste and Toxicant mediation | Toxicity regulation                       | Abiotic        |
| Waste and Toxicant mediation | Water filtration                          | Abiotic        |
| Waste and Toxicant mediation | Water purification                        | Abiotic        |
| Waste and toxicant mediation | Nutrient retention                        | Abiotic        |
| Waste and toxicant mediation | Pest and disease control                  | Abiotic        |
| Water regulation             | Fresh water                               | Abiotic        |
| Water regulation             | Water storage                             | Abiotic        |
| Water regulation             | Water supply                              | Abiotic        |
| Water regulation             | Fresh water                               | Abiotic        |
| Water regulation             | Water treatment                           | Abiotic        |

2b:

| Harmonised variable        | Former (original) indication      | Classification |
|----------------------------|-----------------------------------|----------------|
| (Illegal) human activities | Conflicting activities            | Anthropogenic  |
| (Illegal) human activities | Illegal catches                   | Anthropogenic  |
| (Illegal) human activities | illegal logging                   | Anthropogenic  |
| (Illegal) human activities | Picking of plants                 | Anthropogenic  |
| (Illegal) human activities | Poaching                          | Anthropogenic  |
| (Illegal) human activities | Gas extraction                    | Anthropogenic  |
| (Illegal) human activities | Hunting                           | Anthropogenic  |
| Agriculture                | Agriculture                       | Anthropogenic  |
| Agriculture                | Agriculture                       | Anthropogenic  |
| Bad management             | Inappropriate water management    | Anthropogenic  |
| Bad management             | Negligent management              | Anthropogenic  |
| Change in land use         | Abandonment                       | Anthropogenic  |
| Change in land use         | Abandonment of farming            | Anthropogenic  |
| Change in land use         | Changes in land use               | Anthropogenic  |
| Change in land use         | Decrease of crops                 | Anthropogenic  |
| Change in land use         | Depopulation                      | Anthropogenic  |
| Change in land use         | Development of tourist facilities | Anthropogenic  |
| Change in land use         | Extension port areas              | Anthropogenic  |
| Change in land use         | Forest management around the park | Anthropogenic  |
| Change in land use         | Harbour Extension                 | Anthropogenic  |
| Change in land use         | Settlements                       | Anthropogenic  |
| Change in land use         | Soil tillage                      | Anthropogenic  |
| Change in land use         | Spatial planning                  | Anthropogenic  |
| Change in land use         | Urbanisation                      | Anthropogenic  |
| Change in species          | Aging of the wild stocks          | Biotic         |
| Change in species          | Bush encroachment                 | Biotic         |

|                   |                                        |                |
|-------------------|----------------------------------------|----------------|
| Change in species | Change of plant species composition    | Biotic         |
| Change in species | Changes in bird dispersal              | Biotic         |
| Change in species | Disappearing charismatic species       | Biotic         |
| Change in species | Extinction of species                  | Biotic         |
| Change in species | Food competition with cultured species | Biotic         |
| Change in species | Impact of bird colonies                | Biotic         |
| Change in species | Plant species composition              | Biotic         |
| Change in species | Prey decline                           | Biotic         |
| Change in species | Species composition                    | Biotic         |
| Change in species | Species loss                           | Biotic         |
| Change in species | Species reduction                      | Biotic         |
| Change in species | Storms                                 | Biotic         |
| Change in species | Succession                             | Biotic         |
| Change in species | Successional stagnation                | Biotic         |
| Change in species | Sudden oak death                       | Biotic         |
| Change in species | Invasive species                       | Biotic         |
| Civil engineering | Increased number of dams               | Anthropogenic  |
| Climate change    | Change in precipitation                | Climate change |
| Climate change    | Change in snow cover                   | Climate change |
| Climate change    | Changes in snow cover                  | Climate change |
| Climate change    | Climate change                         | Climate change |
| Climate change    | Droughts                               | Climate change |
| Climate change    | Less precipitation                     | Climate change |
| Climate change    | Sea Level Rise                         | Climate change |
| Climate change    | Severe drought                         | Climate change |
| Climate change    | Temperature changes                    | Climate change |
| Climate change    | Climate change                         | Anthropogenic  |
| Diseases          | Diseases                               | Biotic         |
| Diseases          | Forest pests                           | Biotic         |
| Diseases          | Forests pests                          | Biotic         |
| Diseases          | Pests                                  | Biotic         |
| Diseases          | Pests and diseases                     | Biotic         |
| Disturbance       | Anthropogenic disturbance              | Anthropogenic  |
| Disturbance       | Disturbance                            | Anthropogenic  |
| Disturbance       | Disturbance by humans                  | Anthropogenic  |
| Disturbance       | Human actions                          | Anthropogenic  |
| Disturbance       | Human disturbance                      | Anthropogenic  |
| Disturbance       | Off-road Vehicles                      | Anthropogenic  |
| Disturbance       | Transport                              | Anthropogenic  |
| Encroachment      | Heath and scrub encroachment           | Biotic         |
| Encroachment      | Tree Encroachment                      | Biotic         |
| Eutrophication    | Eutrophication                         | Anthropogenic  |
| Eutrophication    | Hypertrophic conditions                | Anthropogenic  |
| Eutrophication    | Nitrification                          | Abiotic        |
| Eutrophication    | Eutrophication                         | Anthropogenic  |
| Exotic species    | Alien species                          | Biotic         |

|                        |                                |               |
|------------------------|--------------------------------|---------------|
| Exotic species         | Exotic Species                 | Biotic        |
| Exotic species         | Invading species               | Biotic        |
| Exotic species         | Invasive Species               | Biotic        |
| Fire                   | Forest fire                    | Abiotic       |
| Fire                   | Forest fires                   | Abiotic       |
| Fire                   | Uncontrolled burning           | Abiotic       |
| Fire                   | Wildfires                      | Abiotic       |
| Fisheries              | Bycatch in gill nets           | Anthropogenic |
| Fisheries              | Fisheries                      | Anthropogenic |
| Fisheries              | Shellfish fisheries            | Anthropogenic |
| Fisheries              | Fishing                        | Anthropogenic |
| Habitat loss           | Aging of marshes               | Abiotic       |
| Habitat loss           | Forest decay                   | Biotic        |
| Habitat loss           | Fragmentation                  | Anthropogenic |
| Habitat loss           | Habitat change                 | Abiotic       |
| Habitat loss           | Habitat loss                   | Abiotic       |
| Habitat loss           | Habitat reduction              | Abiotic       |
| Habitat loss           | Reduction of area              | Abiotic       |
| Habitat loss           | Reduction of intertidal area   | Abiotic       |
| Habitat loss           | Reduction of salt marshes      | Abiotic       |
| Habitat loss           | Urban development              | Anthropogenic |
| Habitat loss           | Isolation                      | Abiotic       |
| Habitat loss           | Landscape fragmentation        | Abiotic       |
| Harmfull Algae         | Algal blooms                   | Biotic        |
| Harmfull Algae         | Toxic algae                    | Biotic        |
| Hydrological changes   | Decrease of sediment transport | Abiotic       |
| Hydrological changes   | Deepening shipping lanes       | Anthropogenic |
| Hydrological changes   | Dredging                       | Anthropogenic |
| Hydrological changes   | Hydraulic                      | Anthropogenic |
| Hydrological changes   | Hydraulic modification         | Anthropogenic |
| Hydrological changes   | Hydroperiod reduction          | Anthropogenic |
| Hydrological changes   | Increased turbidity            | Abiotic       |
| Hydrological changes   | Increasing hydrodynamics       | Anthropogenic |
| Hydrological changes   | Increasing sediment loads      | Abiotic       |
| Hydrological changes   | Increasing turbidity           | Abiotic       |
| Hydrological changes   | Increasing wave action         | Anthropogenic |
| Hydrological changes   | Reduced tidal energy           | Anthropogenic |
| Hydrological changes   | Storm surges                   | Abiotic       |
| Hydrological changes   | Underground water extraction   | Anthropogenic |
| Hydrological changes   | Water management               | Anthropogenic |
| Hydrological changes   | Water quantity                 | Abiotic       |
| Increased salinisation | Groundwater salinisation       | Abiotic       |
| Increased salinisation | Hypersaline conditions         | Anthropogenic |
| Landscape disturbance  | Gas exploitation               | Anthropogenic |
| Landscape disturbance  | Visual ruining of landscape    | Anthropogenic |
| Overexploitation       | Harvesting                     | Anthropogenic |

|                           |                                              |               |
|---------------------------|----------------------------------------------|---------------|
| Overexploitation          | Intensive agriculture                        | Anthropogenic |
| Overexploitation          | Intensive Grazing                            | Anthropogenic |
| Overexploitation          | Negative impact becoming larger than profits | Anthropogenic |
| Overexploitation          | Overexploitation                             | Anthropogenic |
| Overexploitation          | Overfishing                                  | Anthropogenic |
| Overexploitation          | Overgrazing                                  | Anthropogenic |
| Overexploitation          | Over-tourism                                 | Anthropogenic |
| Overexploitation          | Too high boat density                        | Anthropogenic |
| Overexploitation          | Forestry                                     | Anthropogenic |
| Overexploitation          | Other biological resource extraction         | Anthropogenic |
| Pollution                 | Air pollution                                | Anthropogenic |
| Pollution                 | Atmospheric Pollution                        | Anthropogenic |
| Pollution                 | Increased pollution                          | Anthropogenic |
| Pollution                 | Pesticides                                   | Anthropogenic |
| Pollution                 | Pollution                                    | Anthropogenic |
| Pollution                 | Water pollution                              | Anthropogenic |
| Pollution                 | Pollution                                    | Anthropogenic |
| Pollution                 | Sonar and sound pollution                    | Anthropogenic |
| Predation                 | Predation                                    | Biotic        |
| Sediment dynamics changes | Avalanches                                   | Abiotic       |
| Sediment dynamics changes | Embankments within wetlands                  | Anthropogenic |
| Sediment dynamics changes | Erosion                                      | Abiotic       |
| Sediment dynamics changes | Port dredging                                | Anthropogenic |
| Sediment dynamics changes | Sediment disturbance                         | Anthropogenic |
| Sediment dynamics changes | Siltation                                    | Abiotic       |
| Sediment dynamics changes | Soil loss                                    | Abiotic       |
| Tourism                   | Hiking impact                                | Anthropogenic |
| Tourism                   | Mountaineering, rock climbing, speleology    | Anthropogenic |
| Tourism                   | Recreation                                   | Anthropogenic |
| Tourism                   | Recreational activities                      | Anthropogenic |
| Tourism                   | Tourism                                      | Anthropogenic |
| Tourism                   | Tourism                                      | Anthropogenic |
