# Supplementary material for: Ecosystem services in European protected areas: Ambiguity in the views of scientists and managers?
Source: PLoS One. 2017 Nov 15;12(11):e0187143. doi: 10.1371/journal.pone.0187143 (PMC5687704; doi:10.1371/journal.pone.0187143)
Supplement: S4 Table — Indicated for the transitional waters (TW) and the mountainous (MO) protected areas. (PDF) [file pone.0187143.s004.pdf]

**S4. List of Ecosystem Types.** Indicated for the transitional waters (TW) and the mountainous (MO) protected areas.

| <b>Ecosystem Type</b>                                     | <b>Transitional Waters / Mountainous</b> |
|-----------------------------------------------------------|------------------------------------------|
| Aeolic sands with juniper forest and playa lakes          | TW                                       |
| Alpine and subalpine meadows                              | MO                                       |
| Alpine Prairies                                           | MO                                       |
| Altitudinal transects from the Montane to the Alpine belt | MO                                       |
| Coastal and marine ecosystems                             | TW                                       |
| Coastal dunes and sea shore                               | TW                                       |
| Coniferous and mixed mountain forests                     | MO                                       |
| Cupressus Forests                                         | MO                                       |
| Freshwater and brackish marshes with emergent vegetation  | TW                                       |
| Freshwater ecosystems                                     | TW                                       |
| Fruit tree crops                                          | MO                                       |
| Grass lands                                               | MO                                       |
| Heath and Scrub                                           | MO                                       |
| High altitude Alpine Lakes                                | MO                                       |
| High dynamic gulleys                                      | TW                                       |
| High mountain grasslands and shrub lands                  | MO                                       |
| Lagoon fringe reed beds                                   | TW                                       |
| Lagoons                                                   | TW                                       |
| Lichen fields                                             | MO                                       |
| Low dynamic shallow waters                                | TW                                       |
| Mediterranean annual rich dry grassland                   | TW                                       |
| Mediterranean shrub land with cork oak forest             | TW                                       |
| Mid mountain shrub lands                                  | MO                                       |
| Montado                                                   | MO                                       |
| Montane Spruce-Fir-Beech forest                           | MO                                       |
| Mountain lakes and surrounding meadows                    | MO                                       |
| Native Deciduous Forest                                   | MO                                       |
| Natural forests                                           | MO                                       |
| Olea and Ceratonia forests                                | MO                                       |
| Open Lagoon                                               | TW                                       |
| Permanent Grassland                                       | MO                                       |
| Pine forests                                              | MO                                       |
| Pine plantations                                          | MO                                       |
| Quercus forests                                           | MO                                       |
| River                                                     | TW                                       |
| Rocks and screes                                          | MO                                       |
| Rocky Watersheds                                          | MO                                       |
| Salt marshes                                              | TW                                       |
| Seagrass Meadows                                          | TW                                       |

|                               |    |
|-------------------------------|----|
| Seasonal freshwater marshland | TW |
| Shrub lands                   | MO |
| Tidal Flats                   | TW |
| Wetlands                      | TW |
