# Supplementary material for: Ecosystem services in European protected areas: Ambiguity in the views of scientists and managers?
Source: PLOS journal article supplement (doi:10.1371/journal.pone.0187143), 2017-11-15
Supplement: S5 (10.1371/journal.pone.0187143.s005) [file journal.pone.0187143.s005]

1 **S5. List of mistakes made in the surveys and the ways used to correct them.** Categories are Ecosystem Services  
2 (ES), Ecosystem Functions and Structures (EF), Threats (Thr), and Ecosystem Types (ETy). The variable which  
3 was originally indicated (“between quotation marks”) is followed by our Remark on it (unless it may have been  
4 renamed). For the Actions taken: Split means that the term is split into two or three new terms, Rename  
5 means that the original term was renamed (and with its new name entered into the harmonization tables of  
6 S2), Omitted means the term was not used in the analysis (and in case of duplications one of the two terms  
7 was omitted). In the column ‘Renamed in’, the new name for the variable used in the analysis is given.  
8

| <b>Area</b>     | <b>Category</b> | <b>“Original variable” and Remark</b>                                                                                                                                                               | <b>Action</b> | <b>Renamed in</b>            |
|-----------------|-----------------|-----------------------------------------------------------------------------------------------------------------------------------------------------------------------------------------------------|---------------|------------------------------|
| Camargue        | ES              | “Flood retention” is no service, but a function (buffering is the service)                                                                                                                          | Rename        | Buffering floods             |
| Camargue        | ES              | “Waterfowl hunting, fishing, cattle” are separate services                                                                                                                                          | Split         |                              |
| Camargue        | EF              | “Climate change attenuation, Sea level rise attenuation” have (as EF) no clear relation with the ES “sunbathing and swimming” nor with the Thr “destruction due to massive touristic frequentation” | Rename        | Climate regulation           |
| Camargue        | EF              | “Water eputation” (F: Epurification) is a service and not a function (nutrient cycling would have been better)                                                                                      | Rename        | Element cycling              |
| Curonian lagoon | ES              | “Nutrient and toxic substance removal” are not the same. Therefore, split into nutrient control and toxicity control                                                                                | Split         |                              |
| Curonian lagoon | ES              | Denitrification is not a service but a function                                                                                                                                                     | Rename        | Waste and Toxicant mediation |
| Danube          | EF              | “Biological productivity” is not specific enough                                                                                                                                                    | Rename        | Primary production           |
| Danube          | EF              | “Landscape opportunity” is not a clear function nor structure                                                                                                                                       | Rename        | Charismatic landscapes       |
| Doñana          | Thr             | “Phytophthora infestation” is too specific                                                                                                                                                          | Rename        | Diseases                     |
| Doñana          | Thr             | “None” is not a useful term in the threats section                                                                                                                                                  | Omitted       |                              |
| Eastern Scheldt | EF              | “Breeding grounds for birds” is a service not a function                                                                                                                                            | Rename        | Habitat suitability          |
| Eastern Scheldt | EF              | “Salt water” is not a function, nor a service                                                                                                                                                       | Rename        | Habitat suitability          |
| Gran Paradiso   | ES              | “Cultural ecosystem services” is an indistinct, too much overarching, term                                                                                                                          | Omitted       |                              |
| Gran Paradiso   | EF / Thr        | “Tree encroachment” is duplicated as function and threat; it is a threat                                                                                                                            | Omitted as EF |                              |
| Hardangervidda  | ETy             | “Reindeer Lichens Interaction”; an interaction is not an Ecosystem Type                                                                                                                             | Rename        | Lichen fields                |

|                  |         |                                                                                                           |         |                                                      |
|------------------|---------|-----------------------------------------------------------------------------------------------------------|---------|------------------------------------------------------|
| Hardangervidda   | ETy     | “Sheep and Browsing-grassing resources interaction”; an interaction is not an Ecosystem Type              | Rename  | Grass lands                                          |
| Hardangervidda   | ETy     | “Grouse and shrub structure interaction”; an interaction is not an Ecosystem Type                         | Rename  | Shrub lands                                          |
| High Tatra       | EF      | “Water supply” is a service and not a function                                                            | Rename  | Water regulation                                     |
| High Tatra       | ES / EF | “Climate regulation” is indicated as both service and function; function is renamed                       | Rename  | Change of Microclimate                               |
| High Tatra       | Thr     | “B02.06” is a specification of B02                                                                        | Omitted |                                                      |
| High Tatra       | EF      | “Genetic resources” and “Pharmacological resources” are not functions but services                        | Rename  | “Gene pool” and “Primary production”                 |
| High Tatra       | ES / EF | “2.3.1.1 - Pollination” is indicated as service and function; as function renamed                         | Rename  | Population dynamics                                  |
| High Tatra       | ES      | “3.2.2.1 Other cultural outputs – Existence” is an indistinct term                                        | Rename  | Charismatic habitat and species                      |
| High Tatra       | EF      | “Landscape opportunity” is a service not a function                                                       | Rename  | Landscape                                            |
| High Tatra       | Thr     | “Dispersed habitation” and “Urbanisation”, are merely duplications                                        | Omitted |                                                      |
| High Tatra       | ES      | “3.1.1.1 Physical and intellectual interactions with biota, ecosystems, and landscapes” is too indistinct | Rename  | Tourism                                              |
| High Tatra       | ES      | “3.2.2.1 Other cultural outputs – Existence” is too indistinct                                            | Rename  | Tourism                                              |
| High Tatra       | ES / EF | “2.3.3.1 - Soil formation” is indicated as a function as well as a service; as service renamed            | Rename  | Sedimentological regulation                          |
| Oros Idi         | EF      | “Olive oil production” is a service, not a function                                                       | Rename  | Primary production                                   |
| Samaria          | EF      | “Biodiversity” and “Sea scape formation” are different functions                                          | Split   |                                                      |
| Samaria/Oros Idi | EF      | “Habitat provision” is not a function nor structure                                                       | Rename  | Habitat                                              |
| Samaria/Oros Idi | EF      | “Pollination” is not a function for beekeeping but a result of beekeeping                                 | Rename  | Population dynamics                                  |
| Samaria/Oros Idi | EF      | Water treatment is not a function but a service                                                           | Rename  | Hydrodynamics                                        |
| Sierra Nevada    | ES / EF | “Hydrological cycle” and “Water supply” are switched as service and function                              | Rename  | “Hydrological regulation” and “Hydrodynamics”, resp. |

|                 |         |                                                                                          |         |                     |
|-----------------|---------|------------------------------------------------------------------------------------------|---------|---------------------|
| Sierra Nevada   | ES / EF | “Pollination” is indicated as service and function; renamed for EF                       | Rename  | Population dynamics |
| Sierra Nevada   | EF      | “Evapotranspiration” is merely a duplication of “Evaporation”                            | Omitted |                     |
| Sierra Nevada   | EF      | “Water supply” is not a function and merely a duplication of “Water regulation”          | Omitted |                     |
| Western Scheldt | EF      | “Secondary production” to obtain plants as Sea-aster should have been primary production | Rename  | Primary production  |
| Western Scheldt | EF      | “Raw materials” is not a function to obtain sand and gravel (but the service itself)     | Rename  | Habitat suitability |

9  
10
